# Supplementary material for: Protein–inorganic hybrid porous scaffolds for bone tissue engineering
Source: Royal Society of Chemistry journal article supplement (doi:10.1039/d2tb00853j), 2022-01-01
Supplement: d2tb00853j1.pdf [file d2tb00853j1.pdf]

## Supporting Information

### Protein–Inorganic Hybrid Porous Scaffolds for Bone Tissue Engineering

*Minqi Lu,<sup>#a</sup> Liangyan Sun,<sup>#b,c</sup> Jinrong Yao,<sup>a</sup> Bingjiao Zhao,<sup>b,c</sup> Yuehua Liu,<sup>\*b,c</sup> Zhengzhong Shao,<sup>a</sup> and Xin Chen<sup>\*a</sup>*

<sup>a</sup>State Key Laboratory of Molecular Engineering of Polymers, Department of Macromolecular Science, Shanghai Stomatological Hospital & School of Stomatology, Laboratory of Advanced Materials, Fudan University, Shanghai, 200433, People's Republic of China

<sup>b</sup>Department of Orthodontics, Shanghai Stomatological Hospital & School of Stomatology, Fudan University, Shanghai, 200433, People's Republic of China

<sup>c</sup>Shanghai Key Laboratory of Craniomaxillofacial Development and Diseases, Fudan University, Shanghai, 200433, People's Republic of China

<sup>#</sup> M. L and L. S contributed equally to this work.

<sup>\*</sup> Corresponding author: chenx@fudan.edu.cn (X. C.), liuyuehua@fudan.edu.cn (Y. L.)

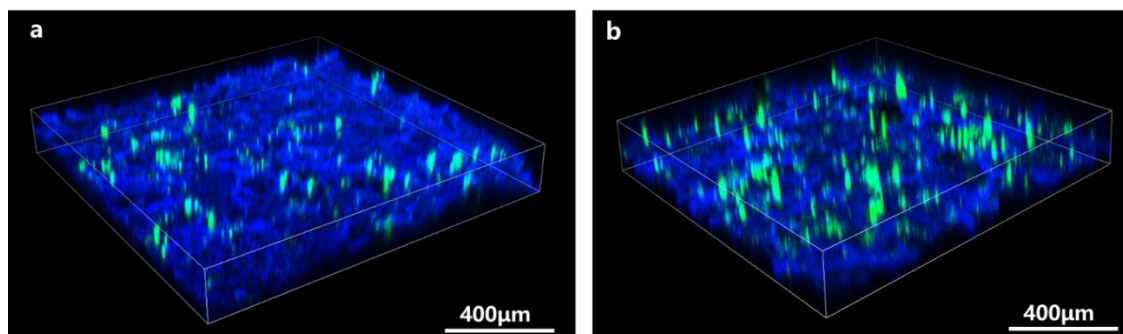

**Fig. S1** Three-dimensional confocal images of BMSCs cultured on S4L5 porous scaffold for 3 days (a) and 7 days (b).

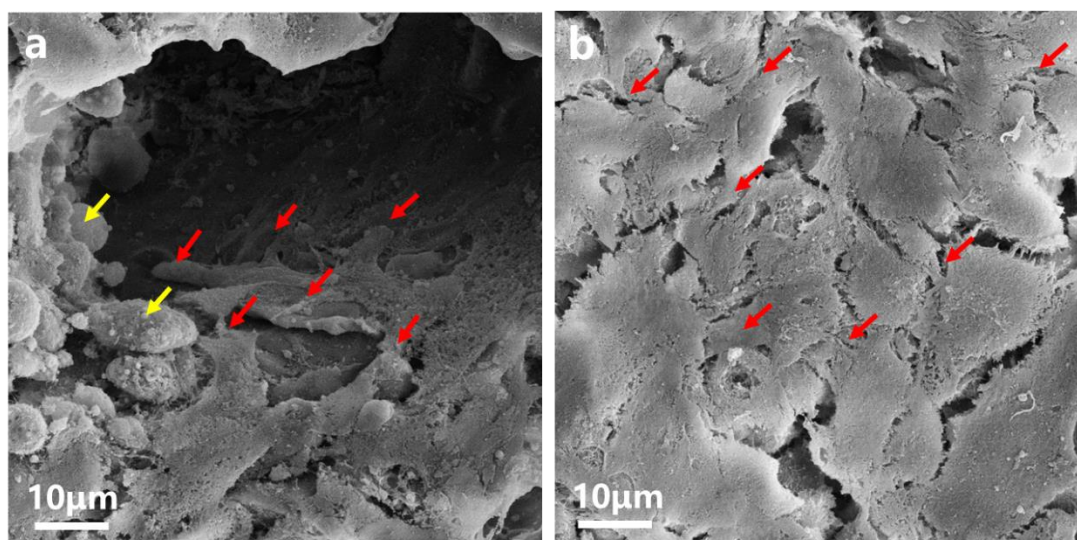

**Fig. S2** SEM images of BMSCs cultured on S4L5 porous scaffolds for 3 days (a) and 7 days (b). (red arrows: spread morphology of BMSCs; yellow arrows: spherical morphology of BMSCs)

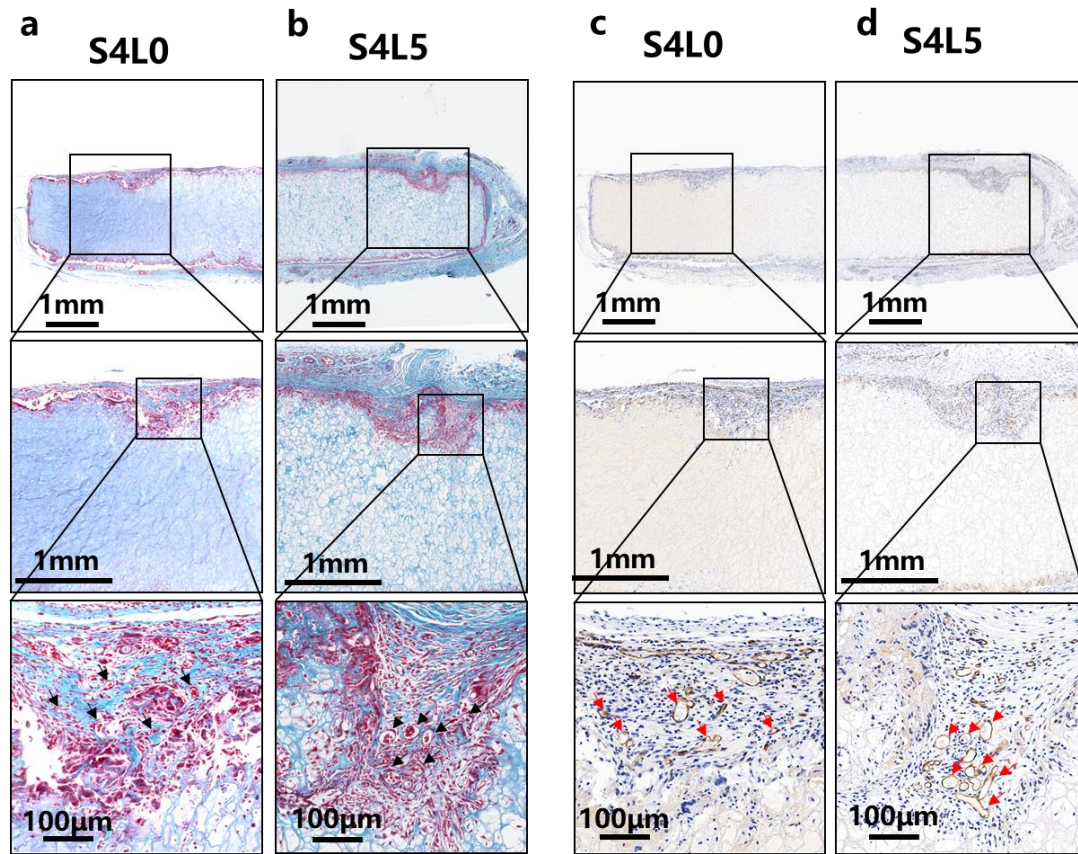

**Fig. S3** (a, b) Masson staining images with different magnifications of S4L0 and S4L5 porous scaffolds after subcutaneous implantation for 2 weeks. The black arrows indicated the blood vessels, which contained red blood cells. (c, d) Immunohistochemistry staining images of the S4L0 and S4L5 porous scaffolds after subcutaneous implantation for 2 weeks assessed by CD31. The red arrows indicated new vessel formation in the interfacial zone between the scaffold and the host tissue.

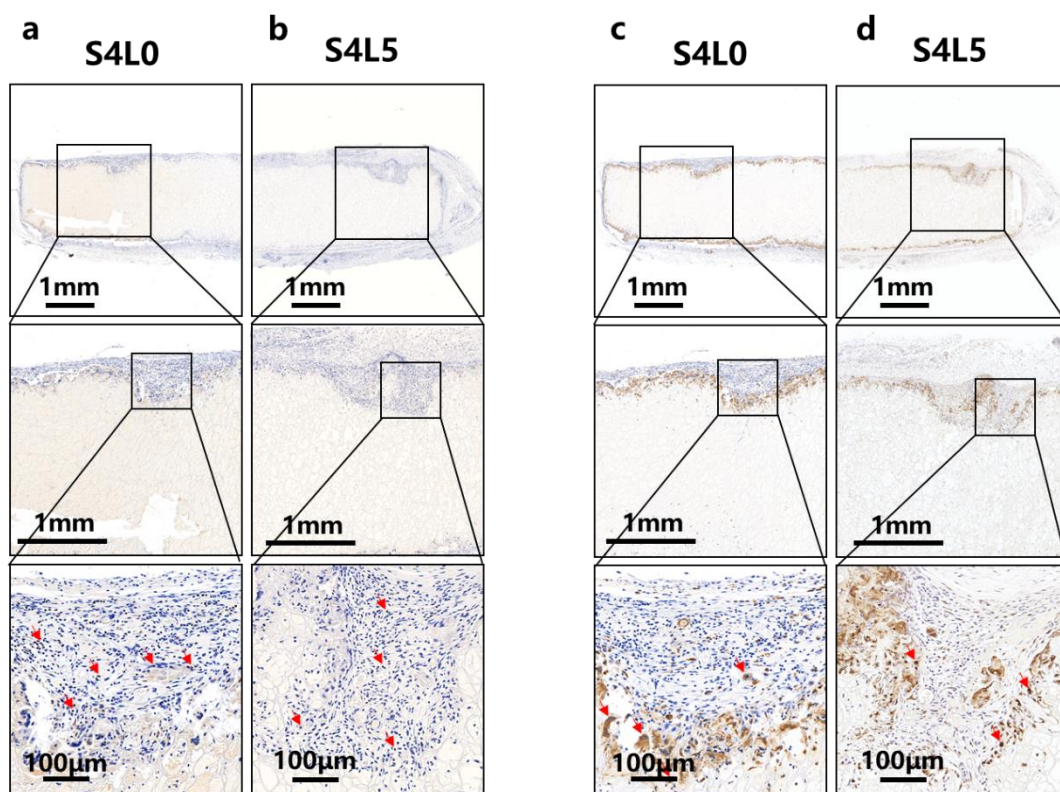

**Fig. S4** Immunohistochemistry staining images of the S4L0 and S4L5 porous scaffolds after subcutaneous implantation for 2 weeks assessed by CD3 (lymphocytes were indicated by red arrows). (c, d) Immunohistochemistry staining images of the S4L0 and S4L5 porous scaffolds after subcutaneous implantation for 2 weeks assessed by CD68 (macrophages were indicated by red arrows).

**Table S1.** Premiers for RT-PCR analysis

| Gene           | Sequences (5'–3')                                          | Product size<br>(bp) |
|----------------|------------------------------------------------------------|----------------------|
| BMP-2          | F: AAAGCGTCAAGCCAAACACAAACA<br>R: CGACCAGAGGCATACAGGGACAAC | 113                  |
| Runx2          | F: TGAGGCCGCGCACGACAACC<br>R: GCGAGGGCAGCACGGAGCACAG       | 108                  |
| OPN            | F: CTGACGGCCGAGGTGATA<br>R: CATGCGGGAGGTGAGGT              | 113                  |
| $\beta$ -actin | F: GGCCGGGACCTGACAGACTACCTC<br>R: GTCACGCACGATTCCCTCTCAGC  | 90                   |
